# Supplementary material
Source: Springer Nature journal article supplement (https://www.springermedizin.de/resource/supplementary/13054_2013_2090_MOESM1_ESM.pdf/9711980)

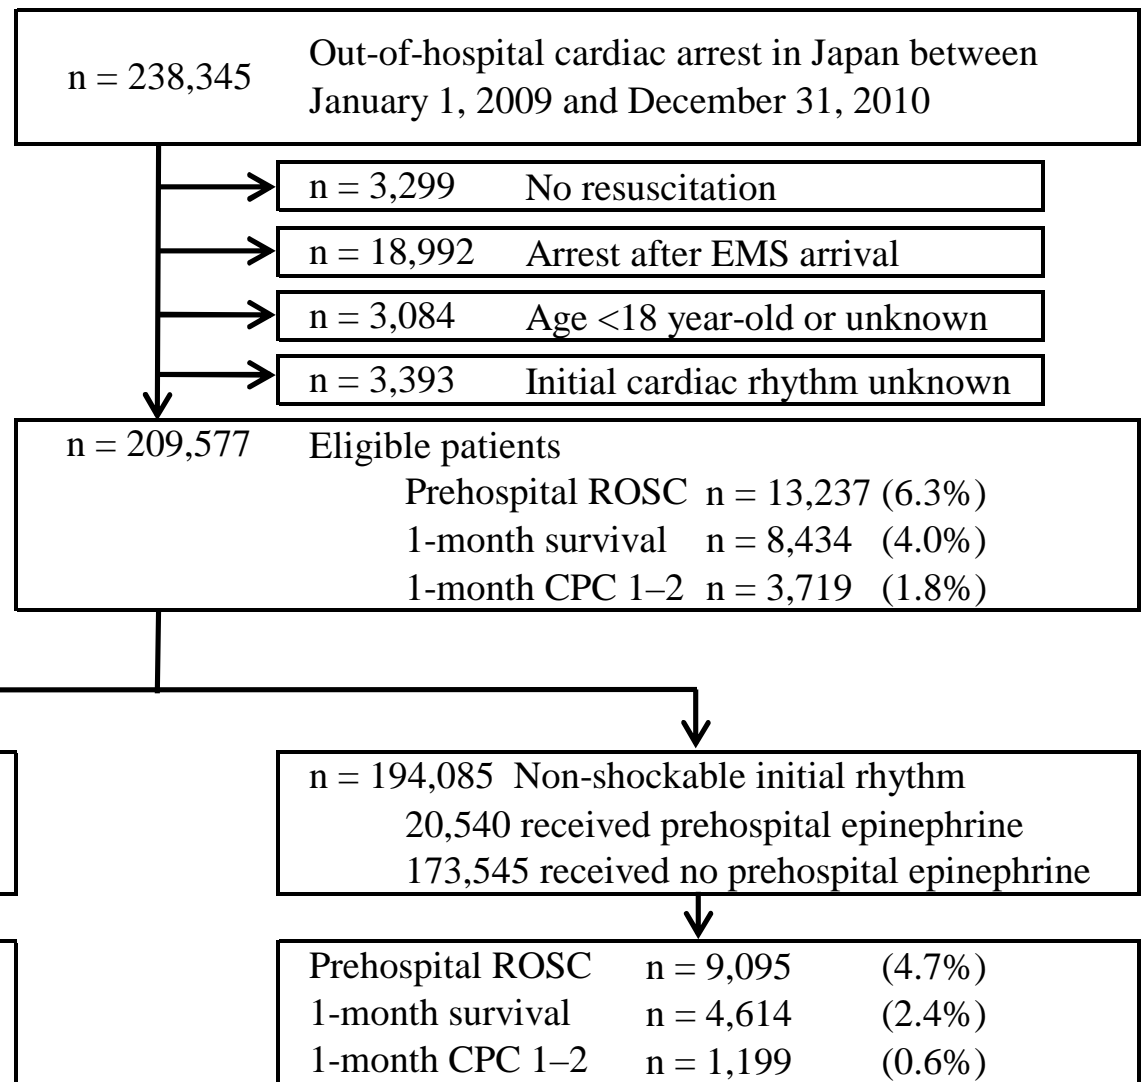

Supplement: MOESM1 [file 9711980]
